# Supplementary material for: Influence of climate variation on phenolic composition and antioxidant capacity of Medicago minima populations
Source: PubMed Central journal article supplement (PMC7237653; doi:10.1038/s41598-020-65160-4), 2020-05-19
Supplement: 41598_2020_65160_MOESM1_ESM.pdf [file 41598_2020_65160_MOESM1_ESM.pdf]

## Influence of climate variation on phenolic composition and antioxidant capacity of *Medicago minima* populations

Kabtni Souhir <sup>1</sup>, Sdouga Dorra <sup>1</sup>, Bettaib Rebey Ines <sup>2</sup>, Save Matthew <sup>2</sup>, Trifi-Farah Neila <sup>1</sup>, Fauconnier Marie-Laure <sup>2</sup>, Marghali Sonia <sup>1\*</sup>

<sup>(1)</sup> *Laboratory of Molecular Genetics, Immunology & Biotechnology, Faculty of Sciences of Tunis, University of Tunis El Manar, Tunisia*

<sup>(2)</sup> *General and organic chemistry-volatolomics, Gembloux Agro-Bio Tech, University of Liège*

\* *Corresponding author: E-mail: soniamarghali@yahoo.fr; [sonia.marghali@fst.utm.tn](mailto:sonia.marghali@fst.utm.tn)*

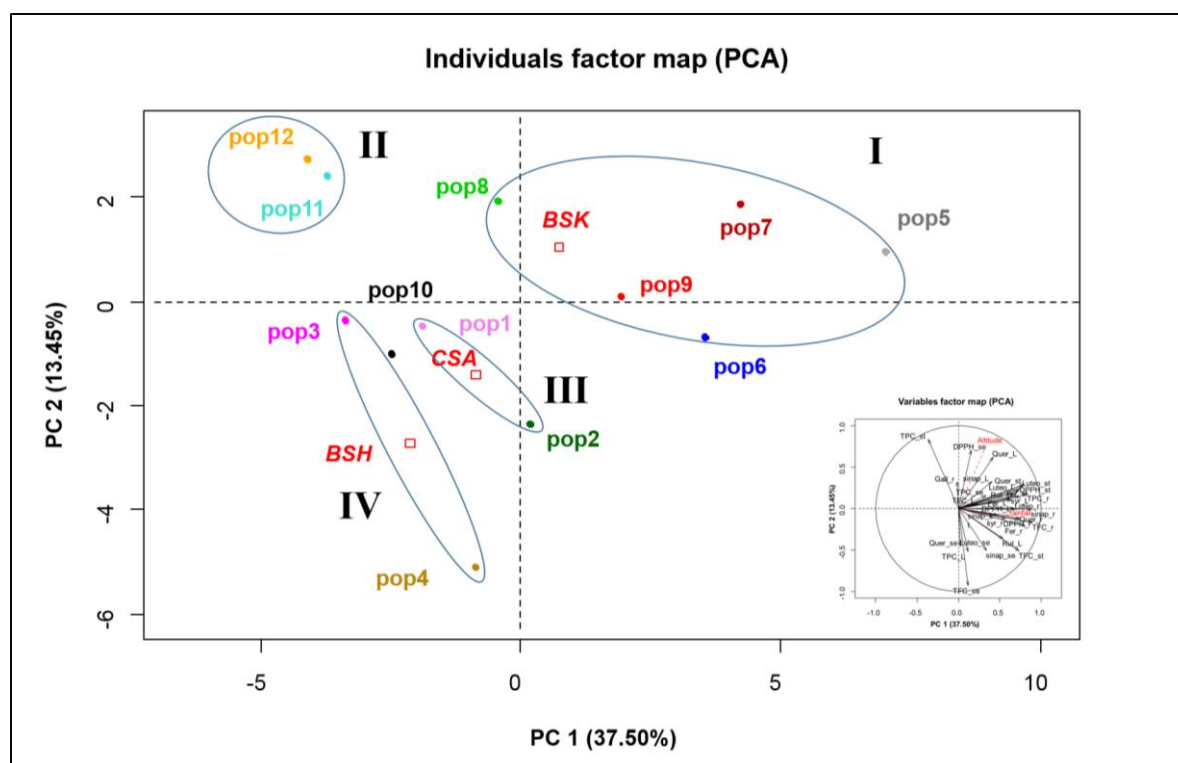

**Supplementary Fig.S1 online.** Principal component analysis of twelve *Medicago minima* populations based on their phenolic profiles in four plants organs. Each population is represented by a specific colour. The PCA analysis displays three principal components that represent 62.21% of the total variation and it highlights four different groups. Those groups are arranged along the gradient generated by the first component, which accounts for 37.50% of the total variance. Several phenolic compounds contents does not participate to the construction of the three PCA axes, such as the gallic acid in roots, all seeds data (except TFC and TEAC), and the TPC, TFC, sinapic acid contents in leaves.

**Supplementary Table S1:** *Kruskal-Wallis* and *ANOVA* analysis of phenolic compounds contents among *Medicago minima* organs (roots, stems, leaves, and seeds).

|                      | <b>Kruskal-Wallis test</b> |                | <b>ANOVA test</b> |                |                |                  |
|----------------------|----------------------------|----------------|-------------------|----------------|----------------|------------------|
|                      | <b>chi-squared</b>         | <b>p-value</b> | <b>Sum Sq</b>     | <b>Mean Sq</b> | <b>F value</b> | <b>Pr(&gt;F)</b> |
| <b>TPC</b>           | 16.397                     | 0.000940       | 246.5             | 82.16          | 8.776          | 0.000113 ***     |
| <b>TFC</b>           | 14.897                     | 0.001907       | 218.3             | 72.76          | 5.287          | 0.00336 **       |
| <b>TEAC</b>          | 22.056                     | 0.0000634      | 34.67             | 11.557         | 13.09          | 0.00000304 ***   |
| <b>ferulic acid</b>  | 34.077                     | 0.000000190    | 6839              | 2279.7         | 7.553          | 0.000351 ***     |
| <b>rutin</b>         | 44.152                     | 0.00000000140  | 604059            | 201353         | 46.85          | < 0.001 ***      |
| <b>sinapic acid</b>  | 31.569                     | 0.000000645    | 93102             | 31034          | 18.21          | 0.000000793 ***  |
| <b>syringic acid</b> | 43.564                     | 0.00000000186  | 683806            | 227935         | 18.96          | 0.000000486 ***  |
| <b>gallic_acid</b>   | 45.738                     | < 0.001        | 3713365           | 1237788        | 140.1          | < 0.001 ***      |
| <b>luteolin</b>      | 19.384                     | 0.000227       | 2395554           | 798518         | 8.444          | 0.000152 ***     |
| <b>quercetin</b>     | 13.357                     | 0.00392        | 675354            | 225118         | 4.241          | 0.00102 *        |

\**p*-value<0.05, the degrees of freedom *Df* = 3

**Supplementary Table S2:** ANOVA analysis of biochemical composition within *Medicago minima* roots, stems, leaves, and seeds extracts.

| Compounds            | Roots        |         |           |               | Stems  |         |           |               | Leaves  |         |           |               | Seeds  |         |           |               |
|----------------------|--------------|---------|-----------|---------------|--------|---------|-----------|---------------|---------|---------|-----------|---------------|--------|---------|-----------|---------------|
|                      | Sum Sq       | Mean Sq | F value   | Pr(>F)        | Sum Sq | Mean Sq | F value   | Pr(>F)        | Sum Sq  | Mean Sq | F value   | Pr(>F)        | Sum Sq | Mean Sq | F value   | Pr(>F)        |
| <b>TPC</b>           | 441.1        | 40.1    | 1.37e+31  | <0.001<br>*** | 202.7  | 18.43   | 4.179e+31 | <0.001<br>*** | 426.5   | 38.77   | 2.969e+30 | <0.001<br>*** | 165.5  | 15.05   | 2.818e+30 | <0.001<br>*** |
| <b>TFC</b>           | 1366         | 124.2   | 5.335e+30 | <0.001<br>*** | 81.2   | 7.381   | 1.179e+31 | <0.001<br>*** | 300.1   | 27.29   | 2.251e+30 | <0.001<br>*** | 69.46  | 6.314   | 6.178e+29 | <0.001<br>*** |
| <b>DPPH</b>          | 35.69        | 3.244   | 1.51e+31  | <0.001<br>*** | 29.96  | 2.724   | 1.129e+31 | <0.001<br>*** | 41.36   | 3.76    | 1.874e+31 | <0.001<br>*** | 9.523  | 0.8658  | 2.811e+30 | <0.001<br>*** |
| <b>I%</b>            | 8325         | 756.8   | 4.151e+30 | <0.001<br>*** | 8831   | 802.9   | 1.012e+31 | <0.001<br>*** | 8947    | 813.4   | 6.517e+30 | <0.001<br>*** | 22.01  | 2.001   | 1.799e+28 | <0.001<br>*** |
| <b>ferulic acid</b>  | 34397        | 3127    | 5.327e+31 | <0.001<br>*** | 2370   | 215.5   | 8.942e+31 | <0.001<br>*** | 2918    | 265.2   | 2.413e+31 | <0.001<br>*** | ND     | ND      | ND        | ND            |
| <b>rutin</b>         | ND           | ND      | ND        | ND            | 86118  | 7829    | 3.045e+31 | <0.001<br>*** | 481215  | 43747   | 1.326e+31 | <0.001<br>*** | ND     | ND      | ND        | ND            |
| <b>sinapic acid</b>  | 227240       | 20658   | 3.602e+31 | <0.001<br>*** | 4457   | 405.2   | 5.146e+31 | <0.001<br>*** | 21648   | 1968    | 9.764e+31 | <0.001<br>*** | 5485   | 498.7   | 2.665e+30 | <0.001<br>*** |
| <b>syringic acid</b> | 227240       | 20658   | 3.602e+31 | <0.001<br>*** | ND     | ND      | ND        | ND            | 1528596 | 138963  | 4.858e+31 | <0.001<br>*** | ND     | ND      | ND        | ND            |
| <b>gallic acid</b>   | 1165903      | 105991  | 3.901e+31 | <0.001<br>*** | ND     | ND      | ND        | ND            | ND      | ND      | ND        | ND            | ND     | ND      | ND        | ND            |
| <b>luteolin</b>      | 1146663<br>4 | 1042421 | 4.343e+31 | <0.001<br>*** | 279726 | 25430   | 1.223e+31 | <0.001<br>*** | 603231  | 54839   | 1.923e+31 | <0.001<br>*** | 132675 | 12061   | 1.802e+30 | <0.001<br>*** |
| <b>quercetin</b>     | 4010440      | 364585  | 4.81e+31  | <0.001<br>*** | 983533 | 89412   | 3.244e+31 | <0.001<br>*** | 1657861 | 150715  | 2.45e+31  | <0.001<br>*** | 355191 | 32290   | 2.272e+30 | <0.001<br>*** |

*TPC* is expressed as mg.EAG/gDM, *TFC* is expressed as mg RE/gDM, *DPPH* is expressed as  $\mu$ g.TEAC/gDM,  $\mu$ g of standards/ ml, *DF* (degrees of freedom) =11, *ND*: not detected, *Signif. codes of p-value*: 0 '\*\*\*' 0.001 '\*\*' 0.001 '\*' 0.05 '.'

**Supplementary Table S3:** Geographic origin and climatic data of twelve *Medicago minima* populations. According to Köppen-Geiger climate classification: **CSA:** temperate dry hot summer, **BSH:** arid hot steppe, **BSK:** Arid cold steppe.

| Populations code/site | GPS                       | Locality  | Geographic origin     | Climate | Bioclimatic region | Altitude (m) |
|-----------------------|---------------------------|-----------|-----------------------|---------|--------------------|--------------|
| Pop1                  | 36°24'14.7"N 9°14'42.8"E  | Siliana   | New-dogga             | CSA     | Middle semi-arid   | 320          |
| Pop2                  | 36°01'27.6"N 10°30'23.0"E | Sousse    | Hergla                | CSA     | Lower semi-arid    | 100          |
| Pop3                  | 35°47'36.1"N 9°48'18.9"E  | Kairouan  | Ainjloula             | BSH     | Higher arid        | 190          |
| Pop4                  | 35°33'13.0"N 9°43'38.9"E  | Kairouan  | Barrage d'el haouareb | BSH     | Higher arid        | 200          |
| Pop5                  | 35°49'38.7"N 9°37'01.8"E  | Kairouan  | Oueslatia             | BSK     | Lower semi-arid    | 550          |
| Pop6                  | 35°34'29.5"N 9°04'15.4"E  | Kasserine | Jedeliene             | BSK     | Lower semi-arid    | 1,009        |
| Pop7                  | 35°51'52.0"N 9°12'36.4"E  | Siliana   | Makther               | CSA     | Middle semi-arid   | 870          |
| Pop8                  | 35°43'55.3"N 9°12'60.0"E  | Siliana   | Rouhia                | BSK     | Lower semi-arid    | 620          |
| Pop9                  | 35°34'49.1"N 8°41'50.4"E  | Kasserine | Thela                 | BSK     | Lower semi-arid    | 980          |
| Pop10                 | 35°15'52.7"N 8°45'27.4"E  | Kasserine | Boulaaba-khamouda     | BSK     | Lower semi-arid    | 850          |
| Pop11                 | 35°01'34.5"N 8°39'07.8"E  | Kasserine | Lac lafiel            | BSK     | Higher arid        | 720          |
| Pop12                 | 34°58'57.7"N 8°33'37.3"E  | Kasserine | Thelept               | BSK     | Higher arid        | 920          |

**Supplementary Table S4:** Geographic distance among twelve *Medicago minima* populations. Distance in Km

| Populations | pop2  | pop3 | pop4 | pop5 | pop6 | pop7  | pop8  | pop9  | pop10 | pop11 | pop12 |
|-------------|-------|------|------|------|------|-------|-------|-------|-------|-------|-------|
| pop1        | 119.4 | 84.5 | 104  | 71.8 | 93.2 | 59.8  | 74.2  | 103.6 | 133.8 | 162   | 169.5 |
|             | pop2  | 68   | 87   | 82.5 | 138  | 117.4 | 120.2 | 169.8 | 178.2 | 201.3 | 211.4 |
|             |       | pop3 | 27.5 | 17.5 | 70.8 | 54.4  | 53.6  | 103   | 111.7 | 135   | 144.6 |
|             |       |      | pop4 | 31.9 | 59.6 | 58.1  | 50.2  | 93.4  | 93.7  | 114   | 123.6 |
|             |       |      |      | pop5 | 56.5 | 36.8  | 37.7  | 87.5  | 99.5  | 124.8 | 134   |
|             |       |      |      |      | pop6 | 34.5  | 22    | 34    | 44.6  | 71.7  | 80.5  |
|             |       |      |      |      |      | pop7  | 14.7  | 56.2  | 78.4  | 106   | 114.6 |
|             |       |      |      |      |      |       | pop8  | 50    | 66.8  | 93.7  | 102.5 |
|             |       |      |      |      |      |       |       | pop9  | 35.3  | 61.7  | 67.6  |
|             |       |      |      |      |      |       |       |       | pop10 | 28.2  | 36    |
|             |       |      |      |      |      |       |       |       |       | pop11 | 9.54  |

**Supplementary Table S5:** Analytical curves for the different bioactive compounds

| Tests | Compounds     | Equation of the calibration curve | R <sup>2</sup> |
|-------|---------------|-----------------------------------|----------------|
| TPC   | gallic acid   | y= 0.00158x + 0.0289              | 0.9948         |
| TFC   | rutine        | y= 0.00157x + 0.0088              | 0.9991         |
| DPPH  | Trolox        | y=0.9588x                         | 0.9451         |
| HPLC  | gallic acid   | y= 7.8688x + 93.571               | 0.9618         |
|       | syringic acid | y= 5.6043x + 46.566               | 0.9915         |
|       | ferulic acid  | y= 75.516x + 352.4                | 0.9922         |
|       | sinapic acid  | y= 37.778x + 70.84                | 0.9853         |
|       | rutin         | y= 18.675x - 36.702               | 0.9976         |
|       | luteolin      | y= 55.424x - 32.354               | 0.9989         |
|       | quercetin     | y= 41.629x - 18.852               | 0.9996         |

(n=3), TPC is expressed as mg.EAG/gDM, TFC is expressed as mg RE/gDM, DPPH is expressed as µg.TEAC/gDM, All HPLC standards are expressed as µg of standards/ml.
